# Supplementary material
Source: publisher site journal article supplement (https://www.dovepress.com/article/249208)
Supplement: Supplementary file 1 [file get_supplementary_file.php]

SUPPLEMENTARY MATERIAL

[Perrone V] et al

**Cardiovascular risk profile in prostate cancer patients treated with GnRH agonists versus antagonists: an Italian real-world analysis**

Valentina Perrone1*, Luca Degli Esposti1*, Elisa Giacomini1, Chiara Veronesi1, Valerio Blini1, Marco Oderda2

1CliCon S.r.l. Health, Economics & Outcomes Research, Ravenna, Italy; 2Department of Surgical Sciences - Urology, Città della Salute e della Scienza di Torino, Molinette Hospital, University of Turin, Turin, Italy

*Both authors contributed equally to this work.

Correspondence:

Valentina Perrone,

Clicon Srl, Health, Economics and Outcomes Research

Ravenna, Italy

Tel: +39 544 38393

Fax: +39 544 212699

E-mail: valentina.perrone@clicon.it

**Index**

[Supplementary Table S1A. Incidence rate of acute myocardial infarction (ICD-9-CM code 410) in the overall cohort of prostate cancer patients treated with GnRH agonists or antagonist 3](#_Toc35608965)

[Supplementary Table S1B. Incidence rate of acute myocardial infarction (ICD-9-CM code 410) in the sub-cohort of prostate cancer patients treated with GnRH agonists or antagonist without previous CV events 3](#_Toc35608966)

[Supplementary Table S2A. Incidence rate of stroke (ICD-9-CM codes 430-437) in the overall cohort of prostate cancer patients treated with GnRH agonists or antagonist 4](#_Toc35608967)

[Supplementary Table S2B. Incidence rate of stroke (ICD-9-CM codes 430-437) in the sub-cohort of prostate cancer patients treated with GnRH agonists or antagonist without previous CV events 4](#_Toc35608968)

[Supplementary Table S3A. Incidence of acute myocardial infarction (ICD-9-CM code 410) in the overall cohort of prostate cancer patients treated with GnRH agonists or antagonist according to characteristics at baseline 5](#_Toc35608969)

[Supplementary Table S3B. Incidence of acute myocardial infarction (ICD-9-CM code 410) in the sub-cohort of prostate cancer patients treated with GnRH agonists without previous CV events according to characteristics at baseline 5](#_Toc35608970)

[Supplementary Table S4A. Incidence of stroke (ICD-9-CM codes 430-437) in the overall cohort of prostate cancer patients treated with GnRH agonists or antagonist according to characteristics at baseline 6](#_Toc35608971)

[Supplementary Table S4B. Incidence of stroke (ICD-9-CM codes 430-437) in the sub-cohort of prostate cancer patients treated with GnRH agonists without previous CV events according to characteristics at baseline 6](#_Toc35608972)

[Suppelmentary Table S5A. Incidence of CV events in the overall cohort of prostate cancer patients treated with GnRH agonists or antagonist according to characteristics at baseline and prior use of ADT therapy 7](#_Toc35608973)

[Supplementary Table S5B. Incidence of CV events in the sub-cohort of prostate cancer patients treated with GnRH agonists or antagonist without previous CV events according to characteristics at baseline and prior use of ADT therapy 8](#_Toc35608974)

# Supplementary Table S1A. Incidence rate of acute myocardial infarction (ICD-9-CM code 410) in the overall cohort of prostate cancer patients treated with GnRH agonists or antagonist

|  | GnRH agonists | GnRH antagonist | P-value |
| --- | --- | --- | --- |
| Patients (n) | 9,097 | 530 |  |
| Patients with acute myocardial infarction (n) | 185 | 5 | 0.079 |
| Overall number of acute myocardial infarction events (n) | 223 | 5 |  |
| Time to event (mean years ± SD) | 1.9 ± 1.3 | 1.1 ±1.0 |  |
| Time to event (median, IQR) | 1.8 (2.0) | 1.1 (1.6) |  |
| Incidence rate/100 person-year | 0.65 | 0.38 | 0.229 |

**Abbreviation:** GnRH, gonadotropin-releasing hormone; SD, standard deviation

# Supplementary Table S1B. Incidence rate of acute myocardial infarction (ICD-9-CM code 410) in the sub-cohort of prostate cancer patients treated with GnRH agonists or antagonist without previous CV events

|  | GnRH agonists | GnRH antagonist | P-value |
| --- | --- | --- | --- |
| Patients (n) | 8,300 | 474 |  |
| Patients with acute myocardial infarction events(n) | 149 | 4 | 0.124 |
| Overall number of acute myocardial infarction events (n) | 175 | 4 |  |
| Time to event (mean years ± SD) | 2.0 ±1.3 | 1.3 ± 1.0 |  |
| Time to event (median, IQR) | 1.9 (2.0) | 1.5 (1.5) |  |
| Incidence rate/100 person-year | 0.57 | 0.34 | 0.298 |

**Abbreviation:** GnRH, gonadotropin-releasing hormone; SD, standard deviation

# Supplementary Table S2A. Incidence rate of stroke (ICD-9-CM codes 430-437) in the overall cohort of prostate cancer patients treated with GnRH agonists or antagonist

|  | GnRH agonists | GnRH antagonist | P-value |
| --- | --- | --- | --- |
| Patients (n) | 9,097 | 530 |  |
| Patients with stroke (n) | 657 | 22 | 0.007 |
| Overall number of stroke events (n) | 843 | 26 |  |
| Time to event (mean years ± SD) | 1.8 ±1.3 | 1.5 ±1.4 |  |
| Time to event (median, IQR) | 1.5 (2.0) | 1.1 (2.6) |  |
| Incidence rate/100 person-year | 2.38 | 1.70 | 0.120 |

**Abbreviation:** GnRH, gonadotropin-releasing hormone; SD, standard deviation

# Supplementary Table S2B. Incidence rate of stroke (ICD-9-CM codes 430-437) in the sub-cohort of prostate cancer patients treated with GnRH agonists or antagonist without previous CV events

|  | GnRH agonists | GnRH antagonist | P-value |
| --- | --- | --- | --- |
| Patients (n) | 8,300 | 474 |  |
| Patients with stroke (n) | 567 | 19 | 0.017 |
| Overall number of stroke events (n) | 727 | 23 |  |
| Time to event (mean years ± SD) | 1.8 ± 1.3 | 1.7 ± 1.4 |  |
| Time to event (median, IQR) | 1.6 (2.0) | 1.2 (2.5) |  |
| Incidence rate/100 person-year | 2.21 | 1.62 | 0.179 |

**Abbreviation:** GnRH, gonadotropin-releasing hormone; SD, standard deviation

# Supplementary Table S3A. Incidence of acute myocardial infarction (ICD-9-CM code 410) in the overall cohort of prostate cancer patients treated with GnRH agonists or antagonist according to characteristics at baseline

|  | HR | 95% CI min | 95% CI max | P-value |
| --- | --- | --- | --- | --- |
| Age | 1.040 | 1.019 | 1.061 | <0.001 |
| Hypertension | 1.590 | 1.058 | 2.389 | 0.026 |
| Diabetes | 1.086 | 0.800 | 1.476 | 0.596 |
| Dyslipidemia | 2.728 | 2.001 | 3.719 | <0.001 |
| Cardiac therapy | 1.076 | 0.739 | 1.566 | 0.701 |
| Previous CV events | 2.209 | 1.517 | 3.217 | <0.001 |
| Treatment |  |  |  |  |
| GnRH agonists | 1.00 |  |  |  |
| GnRH antagonist | 0.626 | 0.257 | 1.527 | 0.303 |

**Abbreviation:** CI, confidence interval; CV, cardiovascular; GnRH, gonadotropin-releasing hormone; HR, Hazard Ratio

# Supplementary Table S3B. Incidence of acute myocardial infarction (ICD-9-CM code 410) in the sub-cohort of prostate cancer patients treated with GnRH agonists without previous CV events according to characteristics at baseline

|  | HR | 95% CI min | 95% CI max | P-value |
| --- | --- | --- | --- | --- |
| Age | 1.051 | 1.027 | 1.075 | <0.001 |
| Hypertension | 1.483 | 0.982 | 2.240 | 0.061 |
| Diabetes | 1.078 | 0.764 | 1.523 | 0.668 |
| Dyslipidemia | 1.611 | 0.839 | 3.093 | 0.152 |
| Cardiac therapy | 1.037 | 0.659 | 1.633 | 0.874 |
| Treatment |  |  |  |  |
| GnRH agonists | 1.00 |  |  |  |
| GnRH antagonist | 0.672 | 0.248 | 1.820 | 0.435 |

**Abbreviation:** CI, confidence interval; CV, cardiovascular; GnRH, gonadotropin-releasing hormone; HR, Hazard Ratio

# Supplementary Table S4A. Incidence of stroke (ICD-9-CM codes 430-437) in the overall cohort of prostate cancer patients treated with GnRH agonists or antagonist according to characteristics at baseline

|  | HR | 95% CI min | 95% CI max | P value |
| --- | --- | --- | --- | --- |
| Age | 1.056 | 1.044 | 1.067 | <0.001 |
| Hypertension | 1.090 | 0.905 | 1.314 | 0.364 |
| Diabetes | 1.052 | 0.891 | 1.243 | 0.551 |
| Dyslipidemia | 1.467 | 1.214 | 1.771 | <0.001 |
| Cardiac therapy | 1.093 | 0.889 | 1.343 | 0.400 |
| Previous CV events | 1.751 | 1.395 | 2.199 | <0.001 |
| Treatment |  |  |  |  |
| GnRH agonists | 1.00 |  |  |  |
| GnRH antagonist | 0.789 | 0.515 | 1.208 | 0.276 |

**Abbreviation:** CI, confidence interval; CV, cardiovascular; GnRH, gonadotropin-releasing hormone; HR, Hazard Ratio

# Supplementary Table S4B. Incidence of stroke (ICD-9-CM codes 430-437) in the sub-cohort of prostate cancer patients treated with GnRH agonists without previous CV events according to characteristics at baseline

|  | HR | 95% CI min | 95% CI max | P value |
| --- | --- | --- | --- | --- |
| Age | 1.058 | 1.046 | 1.071 | <0.001 |
| Hypertension | 1.092 | 0.901 | 1.324 | 0.368 |
| Diabetes | 1.062 | 0.887 | 1.273 | 0.511 |
| Dyslipidemia | 1.585 | 1.291 | 1.947 | <0.001 |
| Cardiac therapy | 1.154 | 0.917 | 1.451 | 0.221 |
| Treatment |  |  |  |  |
| GnRH agonists | 1.00 |  |  |  |
| GnRH antagonist | 0.823 | 0.520 | 1.302 | 0.405 |

**Abbreviation:** CI, confidence interval; CV, cardiovascular; GnRH, gonadotropin-releasing hormone; HR, Hazard Ratio

# Suppelmentary Table S5A. Incidence of CV events in the overall cohort of prostate cancer patients treated with GnRH agonists or antagonist according to characteristics at baseline and prior use of ADT therapy

|  | HR | 95% CI min | 95% CI max | P value |
| --- | --- | --- | --- | --- |
| Age | 1.049 | 1.043 | 1.056 | <0.001 |
| Hypertension | 1.563 | 1.396 | 1.748 | <0.001 |
| Diabetes | 1.058 | 0.968 | 1.158 | 0.215 |
| Dyslipidemia | 1.631 | 1.391 | 1.913 | <0.001 |
| Cardiac therapy | 1.573 | 1.420 | 1.743 | <0.001 |
| Previous CV events | 3.262 | 2.744 | 3.876 | <0.001 |
| Previous ADT |  |  |  |  |
| ADT-naïve | 1.000 |  |  |  |
| ADT-experienced | 1.098 | 0.995 | 1.212 | 0.062 |
| Treatment |  |  |  |  |
| GnRH agonists | 1.000 |  |  |  |
| GnRH antagonist | 0.789 | 0.625 | 0.997 | 0.047 |

**Notes:** patients were defined naïve to ADT therapy if they did not have a prescription for ADT in the 2 years before index date. Patients were defined established to ADT therapy if they had at least one prescription for ADT in the 2 years before index date

# Supplementary Table S5B. Incidence of CV events in the sub-cohort of prostate cancer patients treated with GnRH agonists or antagonist without previous CV events according to characteristics at baseline and prior use of ADT therapy

|  | HR | 95% CI min | 95% CI max | P value |
| --- | --- | --- | --- | --- |
| Age | 1.055 | 1.048 | 1.062 | <0.001 |
| Hypertension | 1.542 | 1.373 | 1.731 | <0.001 |
| Diabetes | 1.088 | 0.986 | 1.201 | 0.092 |
| Dyslipidemia | 1.482 | 1.321 | 1.663 | <0.001 |
| Cardiac therapy | 1.587 | 1.413 | 1.783 | <0.001 |
| Previous ADT |  |  |  |  |
| ADT-naïve | 1.000 |  |  |  |
| ADT-experienced | 1.115 | 1.001 | 1.242 | 0.048 |
| Treatment |  |  |  |  |
| GnRH agonists | 1.000 |  |  |  |
| GnRH antagonist | 0.800 | 0.616 | 1.040 | 0.095 |

**Notes:** patients were defined naïve to ADT therapy if they did not have a prescription for ADT in the 2 years before index date. Patients were defined established to ADT therapy if they had at least one prescription for ADT in the 2 years before index date
